# Supplementary material for: Light-activated electric bistability for evaporated silver nanoparticles in organic field-effect transistors
Source: Royal Society of Chemistry journal article supplement (doi:10.1039/c7cp02589k), 2017-01-01
Supplement: c7cp02589k1.pdf [file c7cp02589k1.pdf]

## Supporting Information

### Title

**Light-Activated Electric Bistability for Evaporated Silver Nanoparticles in Organic Field-Effect Transistor**

*Author(s), and Corresponding Author(s)\**

*Tao Han, Linlin Liu,\* Minying Wei, Cong Wang, Xiaoyan Wu, Zengqi Xie, Yuguang Ma\**

†Institute of Polymer Optoelectronic Materials and Devices, State Key Laboratory of Luminescent Materials and Devices, South China University of Technology, Guangzhou 510640, P. R. China.

## EXPERIMENTAL SECTION

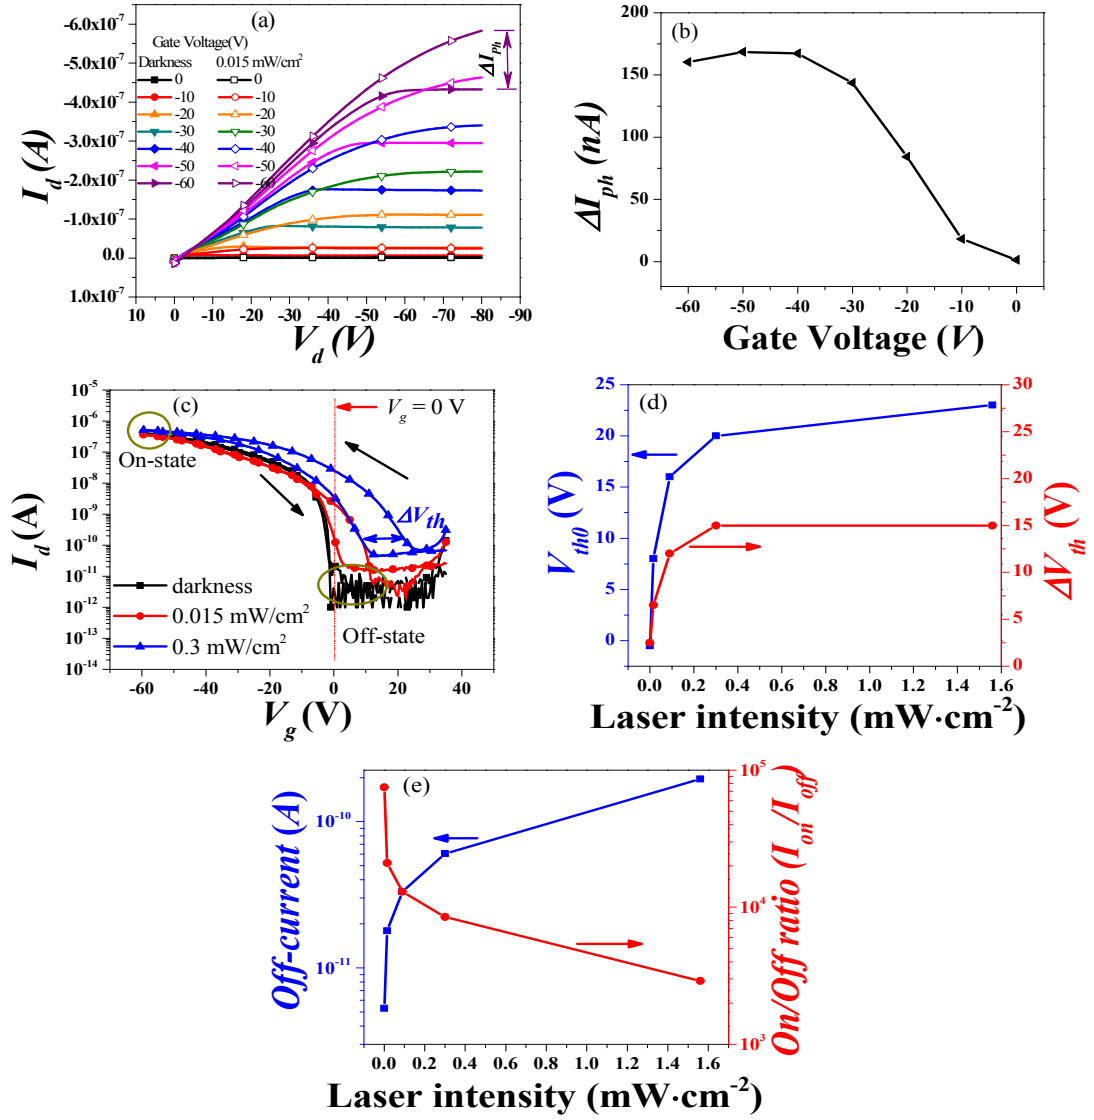

**Figure S1.** (a) the contrastive output characteristics curves of 20 nm-thick PMMA of OFETs device without Ag-NPs (logogram as control device ) in dark and under weak photo-irradiation (0.015 mW/cm<sup>2</sup>), (b) the  $\Delta I_{ph}$  value of control device as a function of gate voltage under photo-irradiation, (c) the transfer  $I$ - $V$  characteristics curves of control device. (d) The  $V_{th0}$  and  $\Delta V_{th}$  of control device variation as a function of laser intensity. (e) The Off-current and On/Off ratio of control device variation as a function of laser intensity.

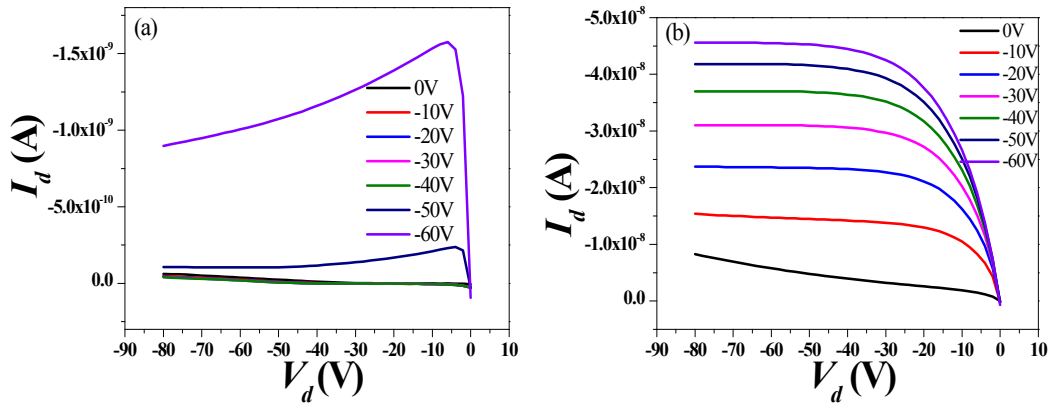

**Figure S2.** The output characteristics curves of 5 nm-thick PMMA of Ag-NPs device embedded with 6 nm-thick Ag-NPs.(a) in dark and (b) under photo-irradiation (10.42 mW/cm<sup>2</sup>).

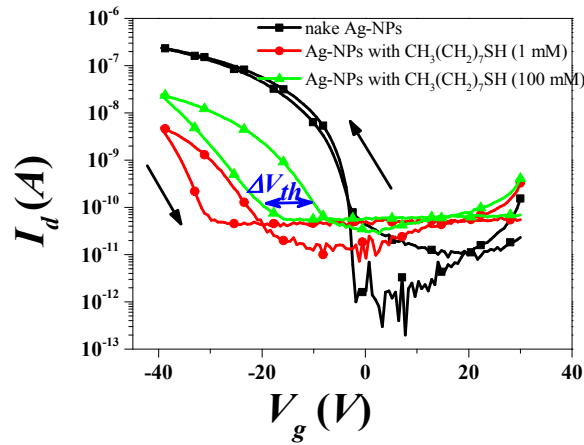

**Figure S3.** The transfer  $I$ - $V$  characteristics curves of 30 nm-thick PMMA of Ag-NPs device embedded with 2 nm-thick Ag-NPs (possessing surface modification or not) in dark. The black line represents the device embedded with naked Ag-NPs; the red line represents the device with Ag-NPs having been immersed in a 1 mM ethanol solution of  $\text{CH}_3(\text{CH}_2)_7\text{SH}$ ; the green line represents the device with Ag-NPs immersed in a 100 mM ethanol solution of  $\text{CH}_3(\text{CH}_2)_7\text{SH}$ . With the purpose of surface modification, the nanoparticle-decorated substrates were immersed in an ethanol solution of  $\text{CH}_3(\text{CH}_2)_7\text{SH}$  with different concentration for 12h for SAM formation.

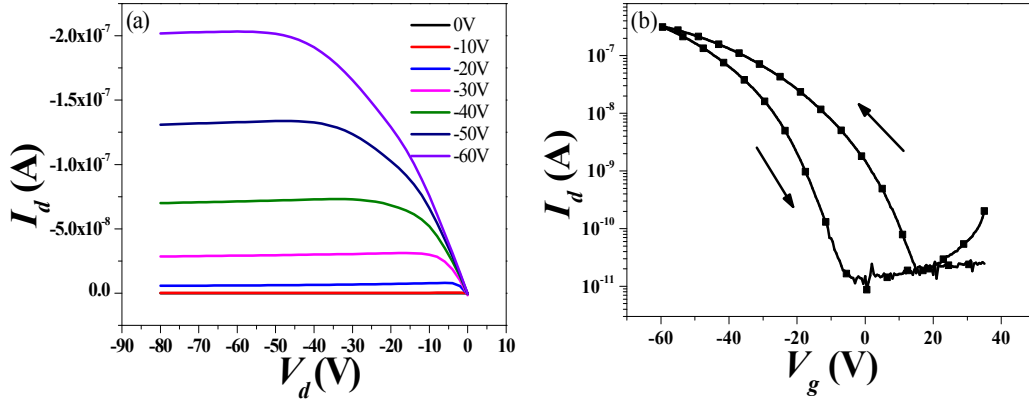

**Figure S4.** The output characteristics curves (a) and transfer  $I$ - $V$  characteristics curves (b) of 20 nm-thick PMMA of Ag-NPs device embedded with 6 nm-thick Ag-NPs (logogram as Ag-NPs (6nm) device) under weak photo-irradiation ( $0.015 \text{ mW/cm}^2$ ).

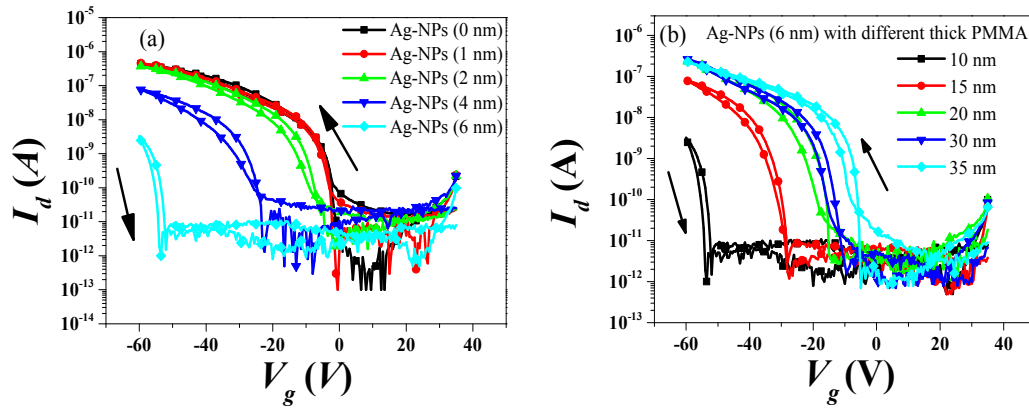

**Figure S5.** The transfer  $I$ - $V$  characteristics curves in dark. (a) 10 nm-thick PMMA of Ag-NPs devices as a function of the thickness of embedded Ag-NPs, and (b) Ag-NPs devices (6 nm thick Ag-NPs) as a function of PMMA thicknesses.

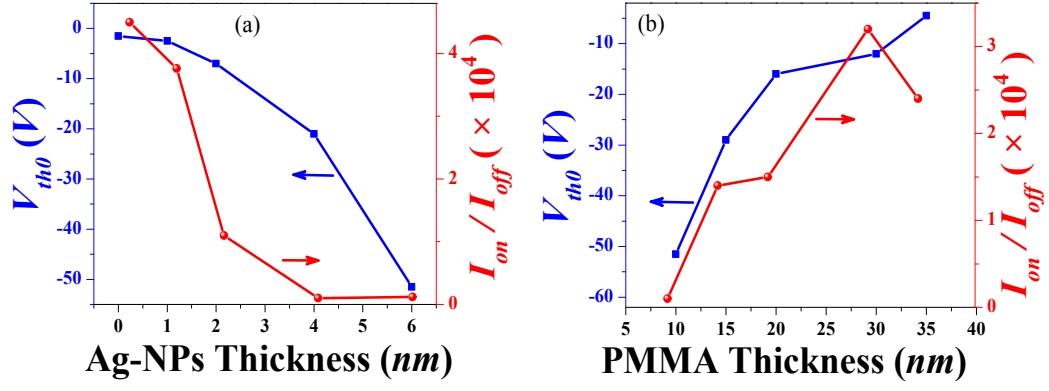

**Figure S6.** (a) The threshold voltage ( $V_{th0}$ ) and the on/off ratio ( $I_{on}/I_{off}$ ) of 10 nm-thick PMMA of Ag-NPs devices in dark as a function of Ag-NPs thicknesses. (b) the threshold voltage ( $V_{th0}$ ) and the on/off ratio ( $I_{on}/I_{off}$ ) of 6 nm-thick Ag-NPs of Ag-NPs devices in dark as a function of PMMA thicknesses.
